# Supplementary material for: Diboron-controlled product selectivity switch in copper-catalyzed decarboxylative substitutions of alkynyl cyclic carbonates
Source: Royal Society of Chemistry journal article supplement (doi:10.1039/d1qo01411k), 2021-01-01
Supplement: d1qo01411k1.pdf [file d1qo01411k1.pdf]

## Supporting Information

### Diboron-Controlled Product Selectivity Switch in Copper-Catalyzed Decarboxylative Substitutions of Alkynyl Cyclic Carbonates

Guojing Pei,<sup>a</sup> Hui Chen,<sup>a</sup> Wan Xu,<sup>a</sup> Tao Chen\*<sup>b</sup> and Juan Li\*<sup>a</sup>

<sup>a</sup>College of Chemistry and Materials Science, Guangdong Provincial Key Laboratory of Functional Supramolecular Coordination Materials and Applications, Jinan University, Guangzhou, Guangdong 510632, P. R. China

<sup>b</sup>SCNU Environmental Research Institute, Guangdong Provincial Key Laboratory of Chemical Pollution and Environmental Safety & MOE Key Laboratory of Theoretical Chemistry of Environment, South China Normal University, Guangzhou 510006, China

\*Corresponding author. Email: tao.chen@m.scnu.edu.cn; tchjli@jnu.edu.cn

---

#### Table of Contents

---

|                   |                                                                                                                                                               |     |
|-------------------|---------------------------------------------------------------------------------------------------------------------------------------------------------------|-----|
| <b>Section 1.</b> | Optimization with D3 dispersion correction (Fig. S1)                                                                                                          | S2  |
| <b>Section 2.</b> | Optimization with M06 and BPW91 methods (Fig. S2)                                                                                                             | S2  |
| <b>Section 3.</b> | Other possible pathways to afford <i>E</i> - <b>P1</b> , <i>E</i> - <b>P1'</b> and <b>P2</b> (Figs. S3-S11)                                                   | S3  |
| <b>Section 4.</b> | The first three steps of the most favorable pathways to afford <i>E</i> - <b>P1'</b> and <b>P2</b> with B <sub>2</sub> neop <sub>2</sub> substrate (Fig. S12) | S8  |
| <b>Section 5.</b> | Catalyst regeneration process (Figs. S13-S14)                                                                                                                 | S9  |
| <b>Section 6.</b> | The metathesis and protonation steps with the B2cat2 substrate. (Fig. S15)                                                                                    | S11 |
| <b>Section 7.</b> | Energies (in Hartree) of All TSs and Intermediates.                                                                                                           | S12 |
| <b>Section 8.</b> | Calculated imaginary frequencies of all transition states species.                                                                                            | S16 |

---

## Section 1. Optimization with D3 dispersion correction

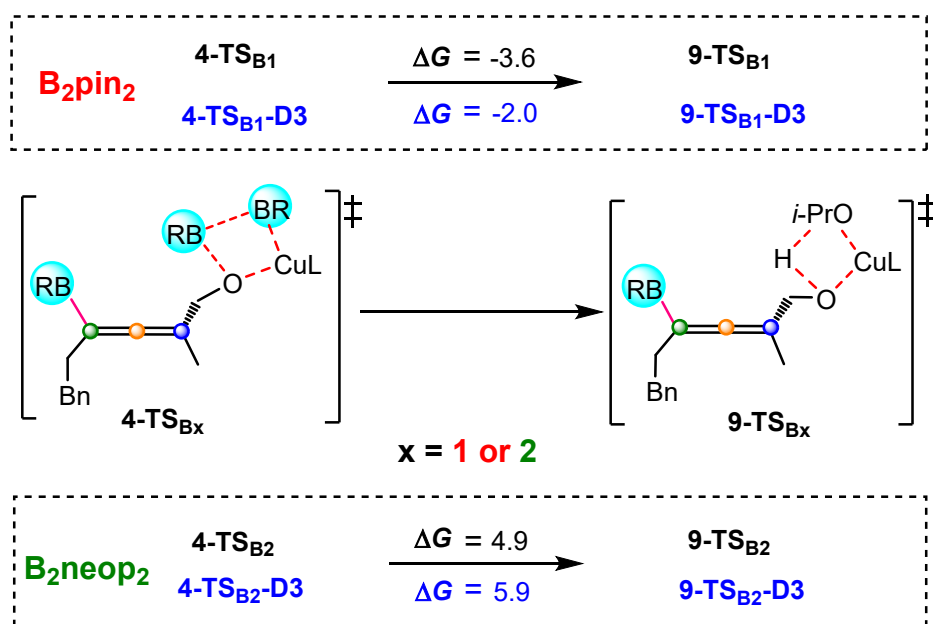

**Fig. S1** Calculated free-energy difference for key species using the M06/BS2//B3LYP/BS1 and M06/BS2//B3LYP-D3/BS1 levels. Values shown are relative free energies in kcal/mol.

## Section 2. Optimization with M06 and BPW91 methods

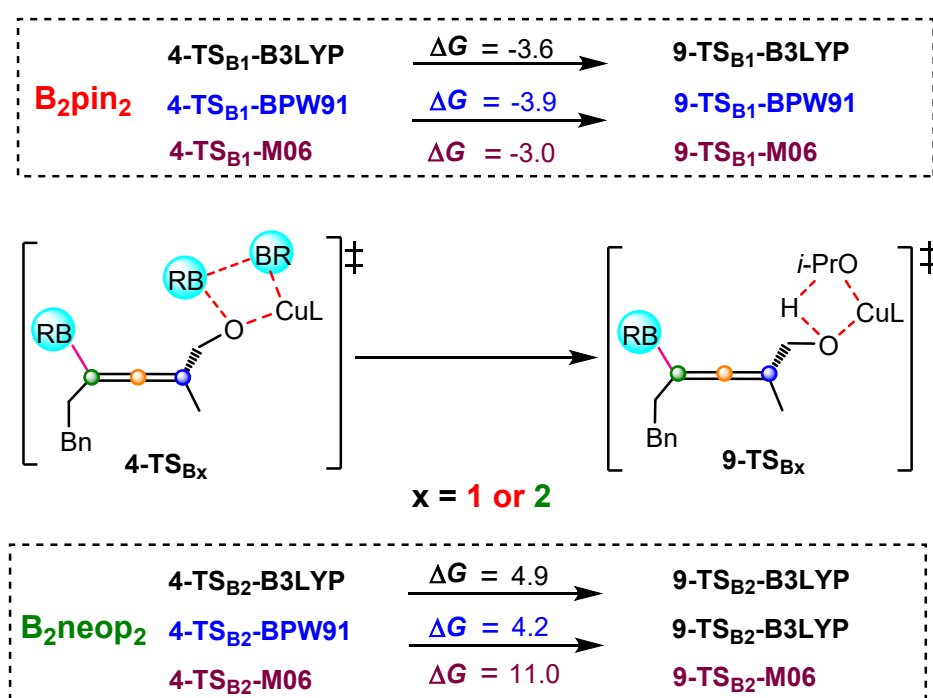

**Fig. S2** Calculated free-energy difference for key species using the

M06/BS2//M06/BS1 and M06/BS2//BPW91/BS1 levels. Values shown are relative free energies in kcal/mol.

### Section 3. Other possible pathways to afford *E*-P1, *E*-P1' and P2

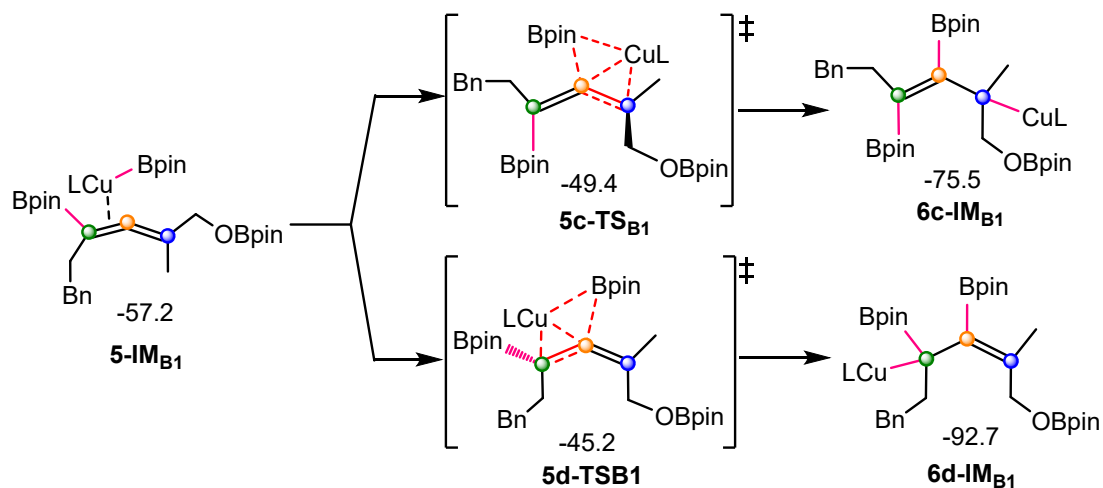

**Fig. S3** Other possible pathways from intermediate **5-IM<sub>B1</sub>**. Values shown are relative free energies in kcal/mol.

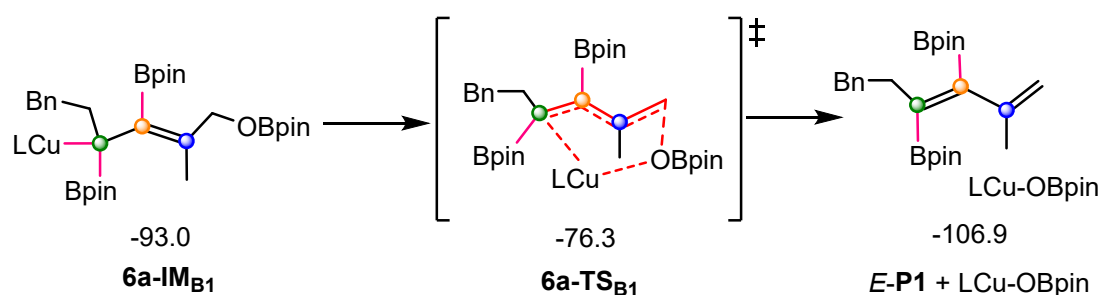

**Fig. S4** Other possible pathways from intermediate **6a-IM<sub>B1</sub>**. Values shown are relative free energies in kcal/mol.

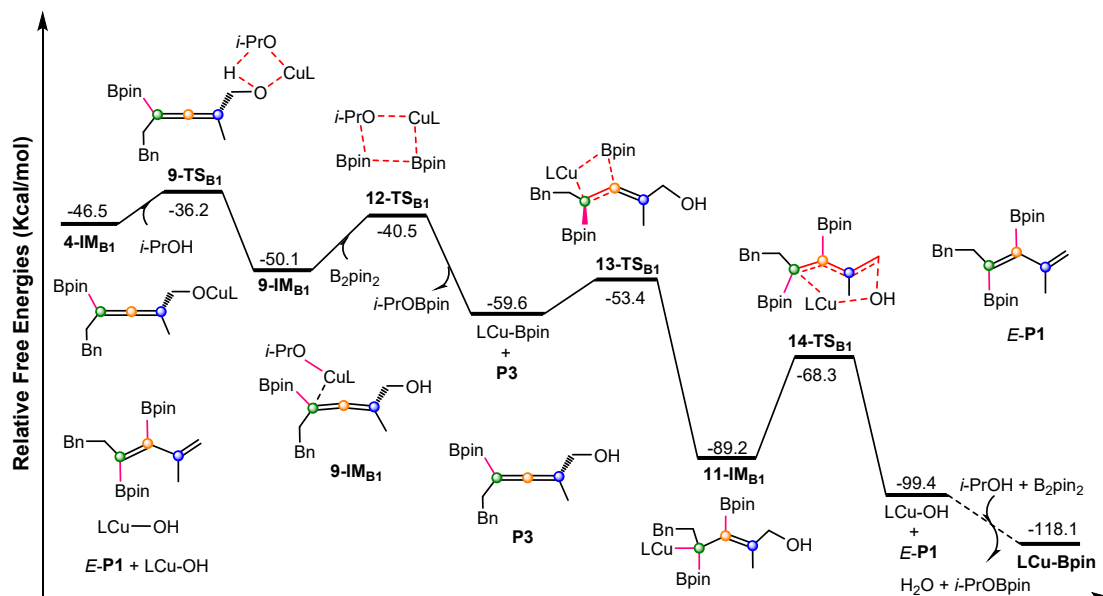

**Fig. S5** Calculated free-energy profiles for other possible mechanism of process 4- $\text{IM}_{\text{B1}} \rightarrow E\text{-P1}$  with  $\text{B}_2\text{pin}_2$  substrate. Values shown are relative free energies in kcal/mol.

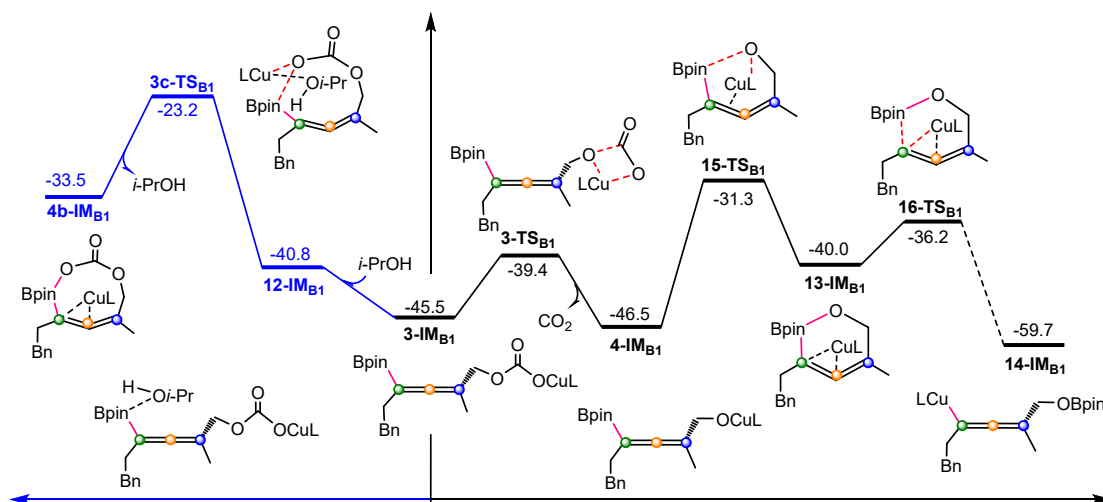

**Fig. S6** Calculated free-energy profiles for other possible pathways from 3- $\text{IM}_{\text{B1}}$  with  $\text{B}_2\text{pin}_2$  substrate. Experiment-based mechanism is given in blue. Values shown are relative free energies in kcal/mol.

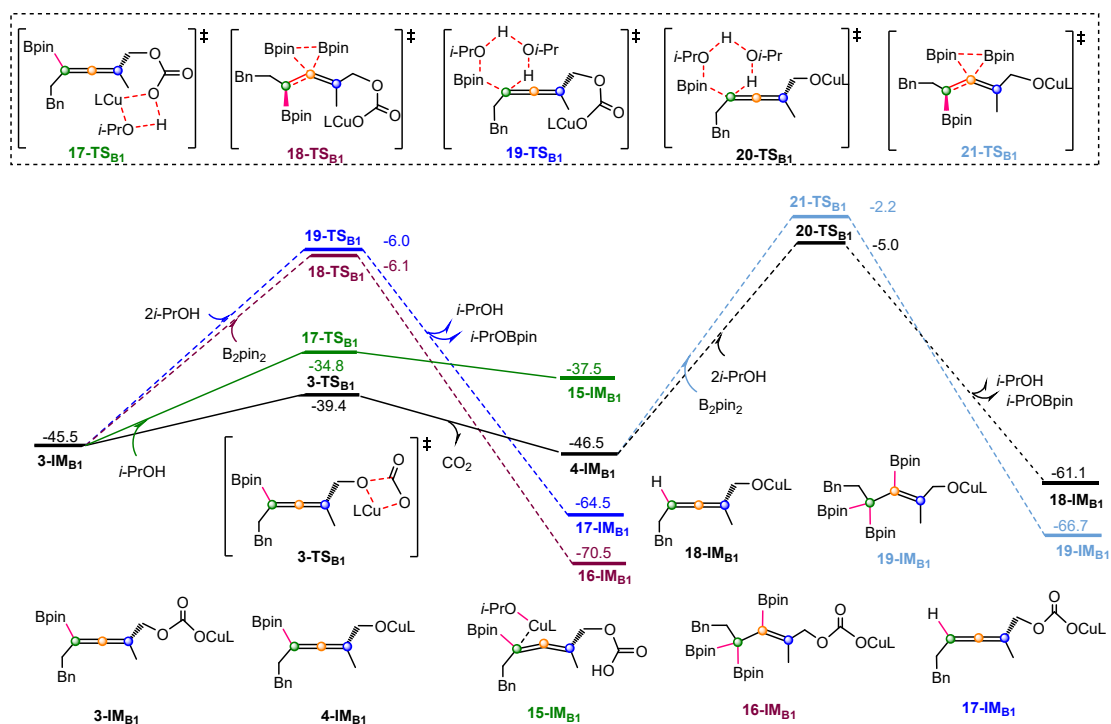

**Fig. S7** Calculated free-energy profiles for other possible pathways from **3-IM<sub>B1</sub>** with **B<sub>2</sub>pin<sub>2</sub>** substrate. Values shown are relative free energies in kcal/mol.

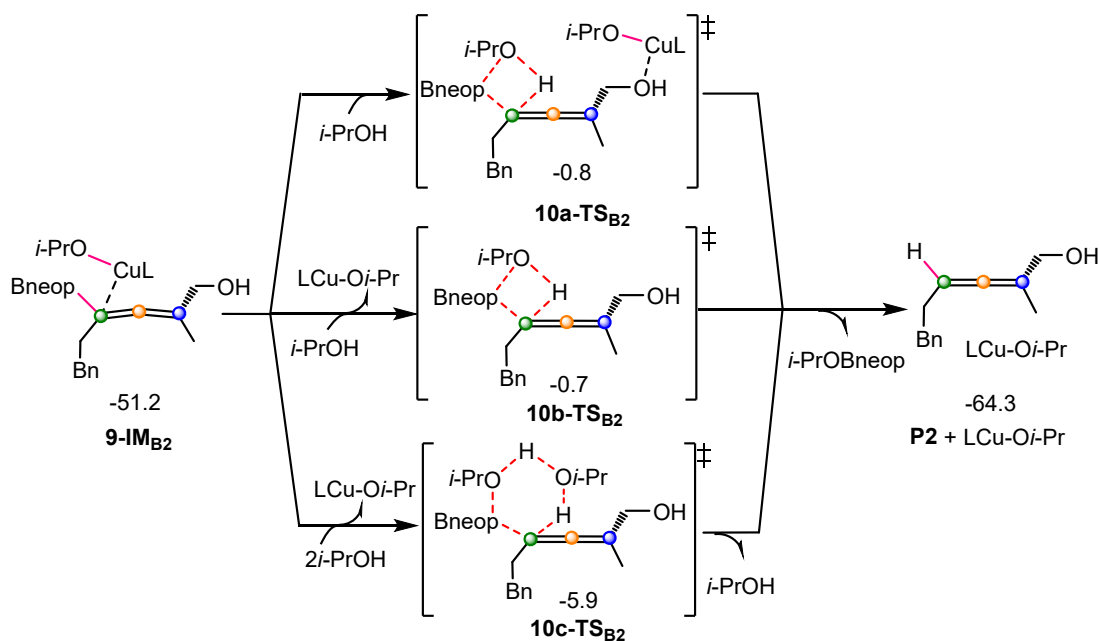

**Fig. S8** Other possible pathways from intermediate **9-IM<sub>B2</sub>**. Values shown are relative free energies in kcal/mol.

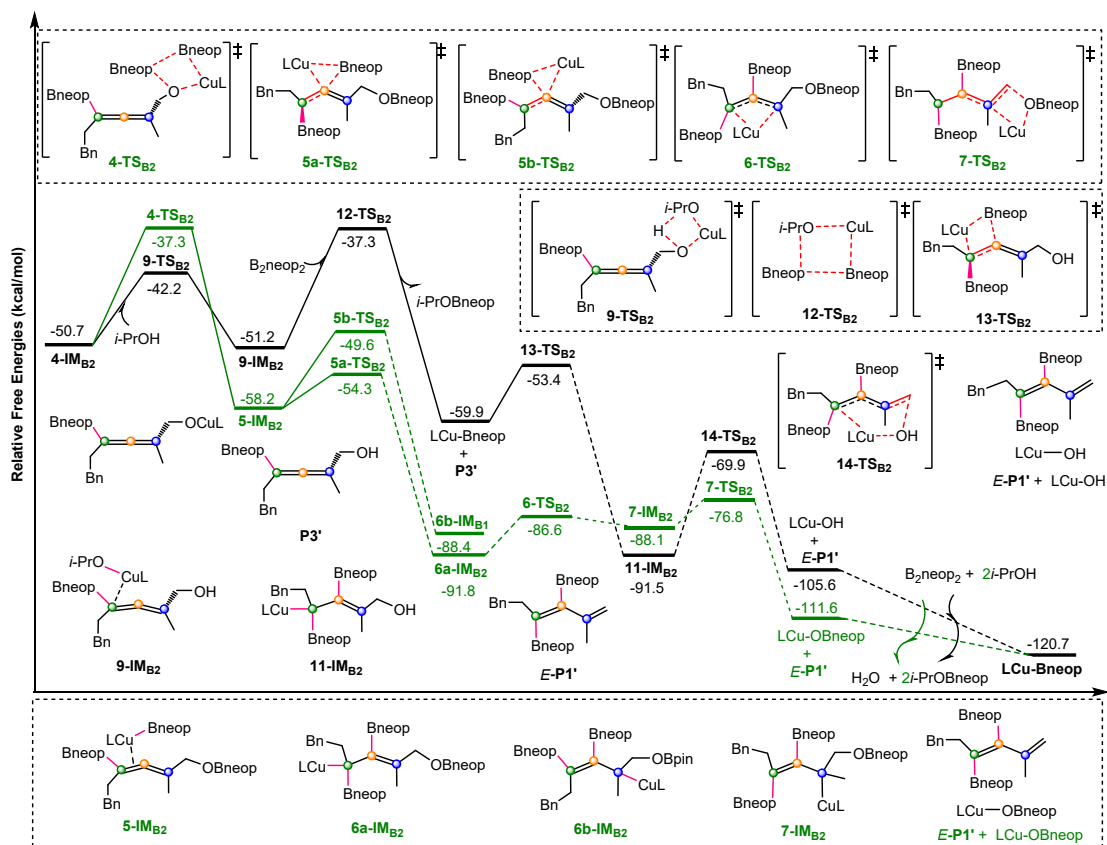

**Fig. S9** Calculated free-energy profiles for other possible pathways for  $4\text{-IM}_{\text{B}_2} \rightarrow E\text{-P1}'$  with  $\text{B}_2\text{neop}_2$  substrate. Values shown are relative free energies in kcal/mol.

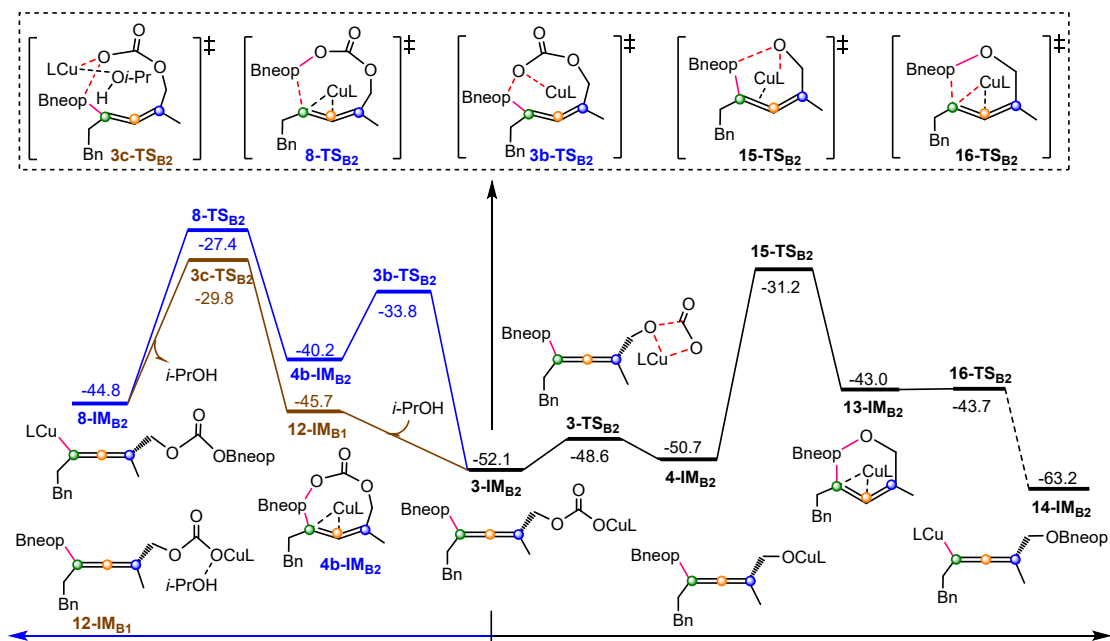

**Fig. S10** Calculated free-energy profiles for other possible pathways from  $3\text{-IM}_{\text{B}_2}$  with  $\text{B}_2\text{neop}_2$  substrate. Values shown are relative free energies in kcal/mol.

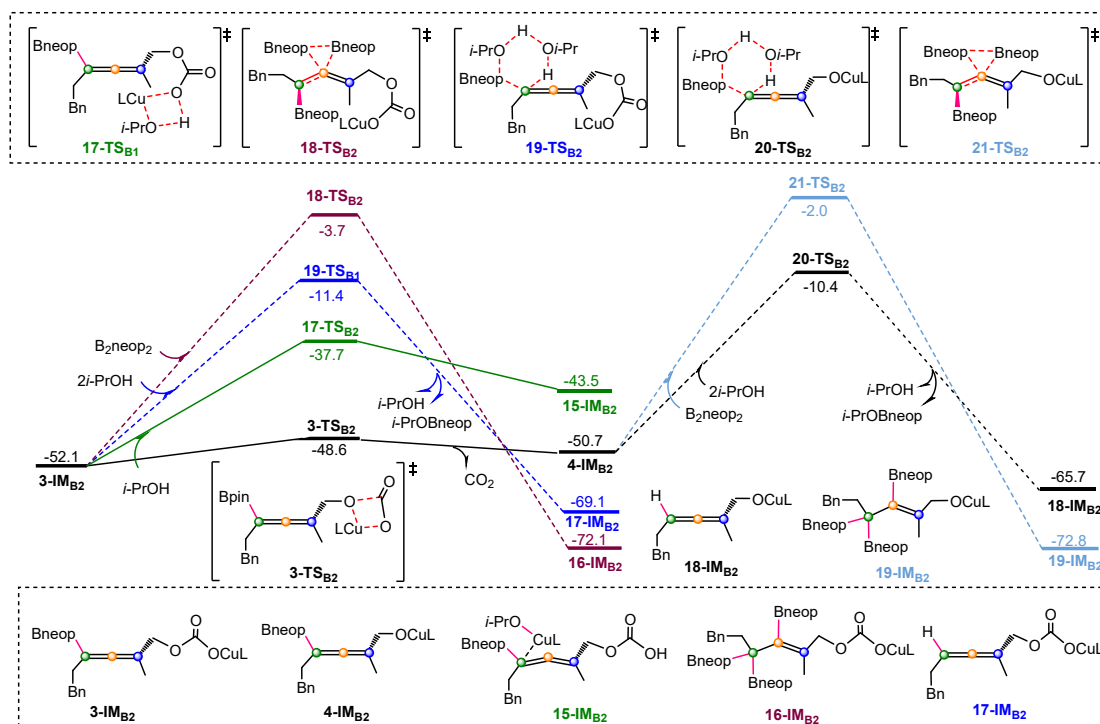

**Fig. S11** Calculated free-energy profiles for other possible pathways from **3-IM<sub>B2</sub>** with **B<sub>2</sub>neop<sub>2</sub>** substrate. Values shown are relative free energies in kcal/mol.

**Section 4. First three steps of most favorable pathways to afford *E*-P1' and P2 with B<sub>2</sub>neop<sub>2</sub> substrate**

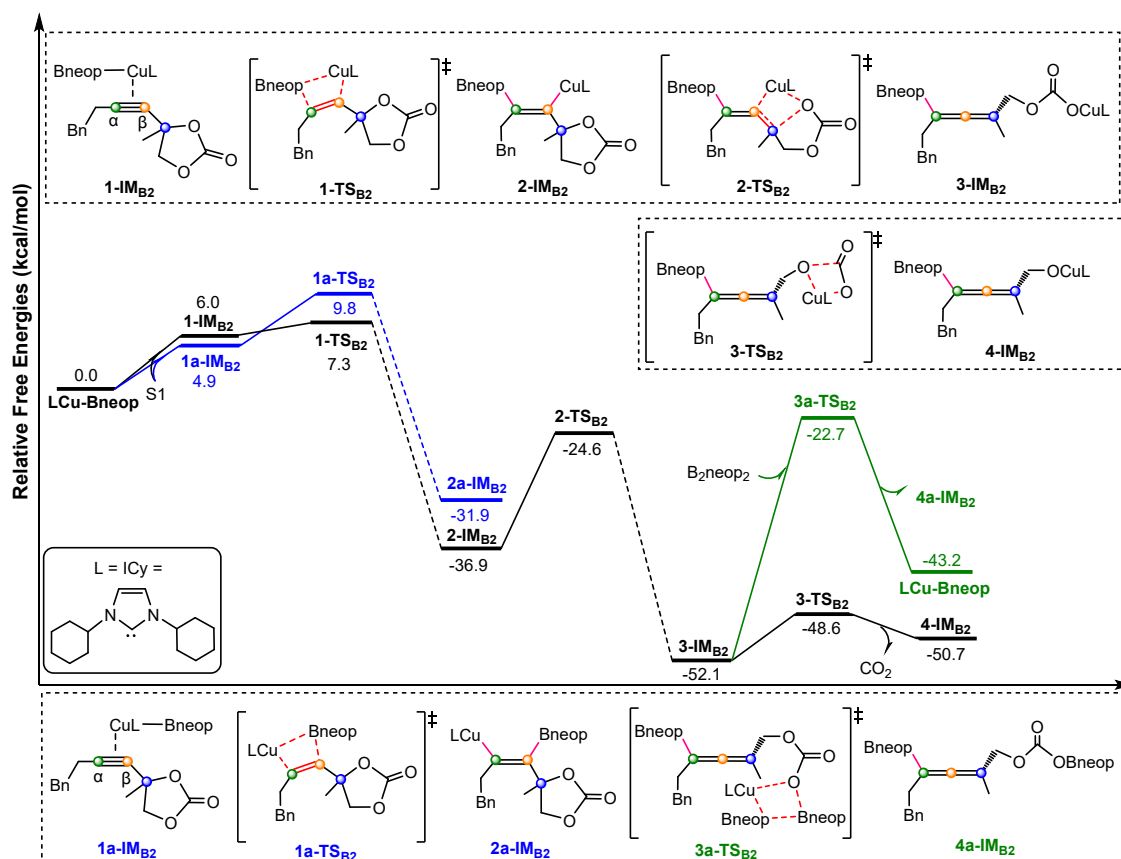

**Fig. S12** Calculated free-energy profiles for first three steps of most favorable pathways to afford *E*-P1' and P2 with B<sub>2</sub>neop<sub>2</sub> substrate. The first step, i.e., C<sub>β</sub>-borylation, is shown in blue. For comparison, an experiment-based mechanism is shown in green. Values shown are relative free energies (kcal/mol).



## Section 5. Catalyst regeneration process

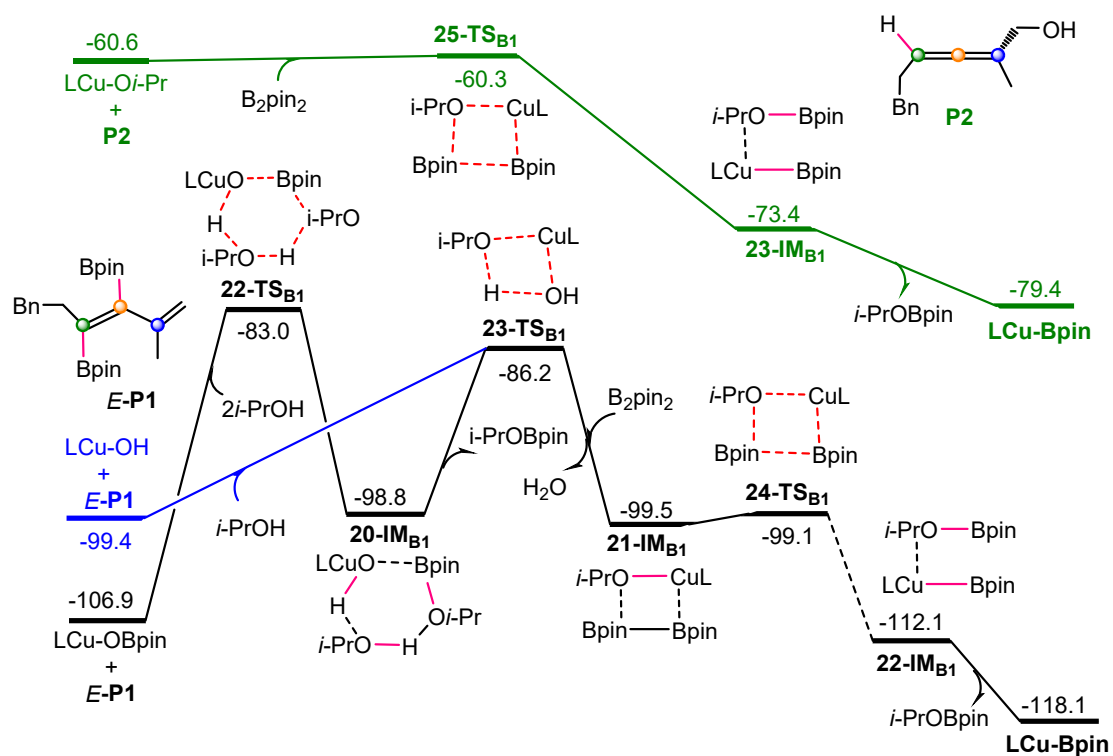

**Fig. S13** Calculated free-energy profiles for catalyst regeneration for B<sub>2</sub>pin<sub>2</sub> system.

Values shown are relative free energies in kcal/mol.

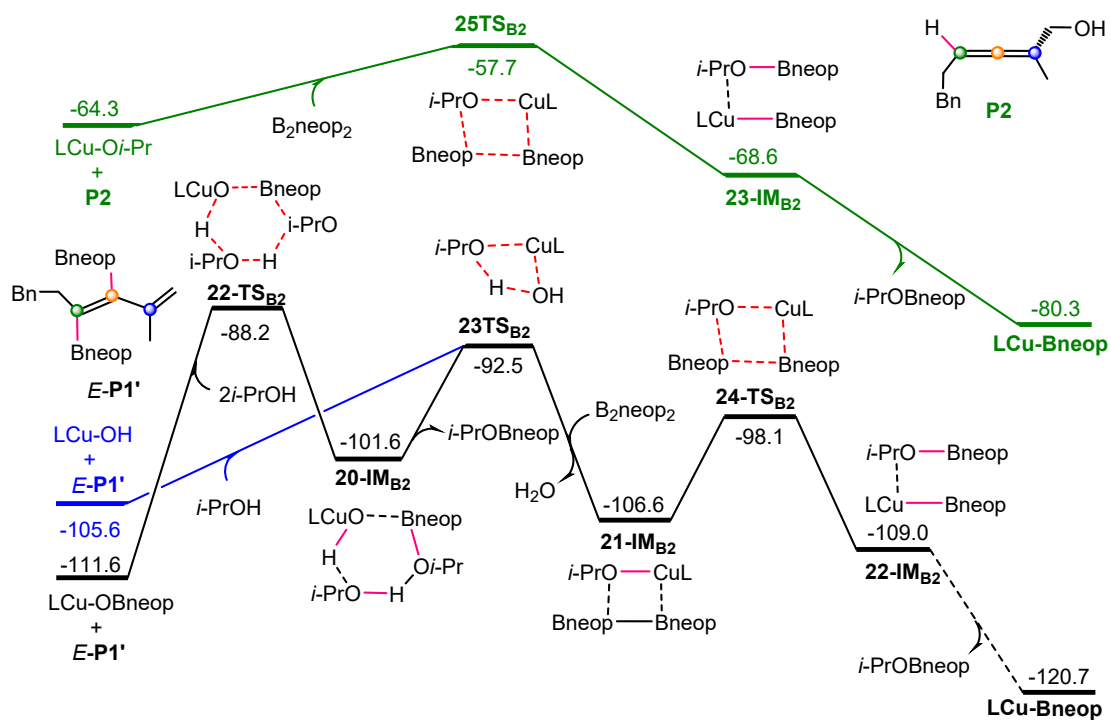

**Fig. S14** Calculated free-energy profiles for catalyst regeneration for  $B_2neop_2$  system.

Values shown are relative free energies in kcal/mol.

Section 6. The metathesis and protonation steps with the  $B_2cat_2$  substrate

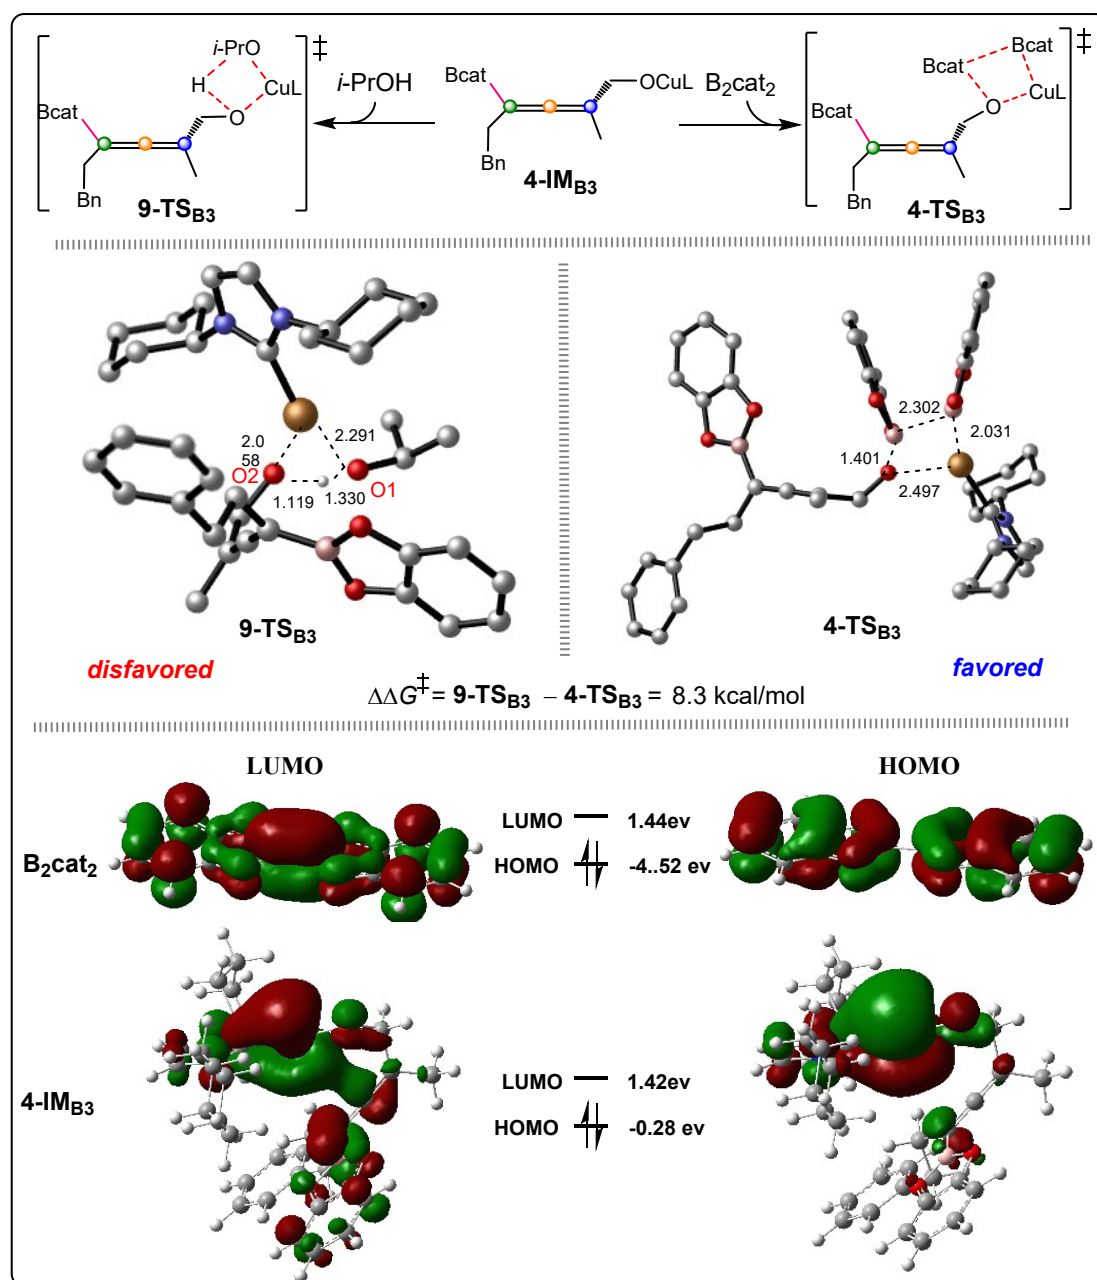

Fig. S15 Optimized structures for product-selectivity-determining transition states  $4-TS_{B3}$  and  $9-TS_{B3}$  along with interatomic distances (angstroms). Frontier molecular orbitals calculated for  $B_2cat_2$  and  $4-IM_{B3}$ . Orbital energies are given in eV.

## Section 7. Energies (in Hartree) of All TSs and Intermediates.

| Geometry                        | E <sub>0</sub> | E            | H <sub>323.15</sub> | G <sub>323.15</sub> | E <sub>(sol,M06)</sub> |
|---------------------------------|----------------|--------------|---------------------|---------------------|------------------------|
| S1                              | -767.300942    | -767.283142  | -767.282119         | -767.352085         | -767.2568272           |
| <i>i</i> -PrOH                  | -194.253721    | -194.247587  | -194.246564         | -194.283871         | -194.2882389           |
| B <sub>2</sub> pin <sub>2</sub> | -822.181612    | -822.158744  | -822.157721         | -822.233848         | -822.2501967           |
| <i>i</i> -PrOBpin               | -604.840886    | -604.823884  | -604.822861         | -604.886146         | -604.8718168           |
| H <sub>2</sub> O                | -76.392569     | -76.389496   | -76.388473          | -76.412044          | -76.4249529            |
| CO <sub>2</sub>                 | -188.568634    | -188.565367  | -188.564344         | -188.588155         | -188.5602234           |
| LCu-Bpin                        | -1302.466603   | -1302.433548 | -1302.432525        | -1302.538738        | -1303.7657053          |
| 1-IM <sub>B1</sub>              | -2069.760543   | -2069.708239 | -2069.707216        | -2069.857750        | -2071.0413925          |
| 1-TS <sub>B1</sub>              | -2069.754239   | -2069.702982 | -2069.701959        | -2069.848443        | -2071.037284           |
| 2-IM <sub>B1</sub>              | -2069.837892   | -2069.786459 | -2069.785436        | -2069.932156        | -2071.1126026          |
| 2-TS <sub>B1</sub>              | -2069.813976   | -2069.762185 | -2069.761162        | -2069.909257        | -2071.0856894          |
| 3-IM <sub>B1</sub>              | -2069.862171   | -2069.809358 | -2069.808335        | -2069.960841        | -2071.1214245          |
| 3-TS <sub>B1</sub>              | -2069.845156   | -2069.793485 | -2069.792462        | -2069.944627        | -2071.1074421          |
| 4-IM <sub>B1</sub>              | -1881.270235   | -1881.220467 | -1881.219444        | -1881.363491        | -1882.5432862          |
| 1a-IM <sub>B1</sub>             | -2069.763036   | -2069.710336 | -2069.709313        | -2069.861723        | -2071.0396906          |
| 1a-TS <sub>B1</sub>             | -2069.742231   | -2069.691360 | -2069.690337        | -2069.834340        | -2071.0274163          |
| 2a-IM <sub>B1</sub>             | -2069.830128   | -2069.778840 | -2069.777817        | -2069.924658        | -2071.1045037          |
| 3a-TS <sub>B1</sub>             | -2892.015601   | -2891.938600 | -2891.937578        | -2892.141232        | -2893.3670994          |
| 4a-IM <sub>B1</sub>             | -1589.562255   | -1589.519536 | -1589.518514        | -1589.644745        | -1589.5936927          |
| 4-TS <sub>B1</sub>              | -2703.446495   | -2703.372950 | -2703.371927        | -2703.568502        | -2704.8067253          |
| 5-IM <sub>B1</sub>              | -2703.460925   | -2703.386531 | -2703.385508        | -2703.581883        | -2704.8367367          |
| 5a-TS <sub>B1</sub>             | -2703.455431   | -2703.381872 | -2703.380849        | -2703.576165        | -2704.8323836          |
| 6a-IM <sub>B1</sub>             | -2703.517577   | -2703.444194 | -2703.443171        | -2703.637477        | -2704.8967468          |
| 5b-TS <sub>B1</sub>             | -2703.442934   | -2703.369247 | -2703.368224        | -2703.563373        | -2704.8214172          |
| 6b-IM <sub>B1</sub>             | -2703.496013   | -2703.424111 | -2703.423088        | -2703.613732        | -2704.8753964          |
| 5c-TS <sub>B1</sub>             | -2703.445188   | -2703.371407 | -2703.370384        | -2703.566225        | -2704.8228389          |
| 6c-IM <sub>B1</sub>             | -2703.491811   | -2703.419509 | -2703.418486        | -2703.609079        | -2704.8709604          |
| 5d-TS <sub>B1</sub>             | -2703.442054   | -2703.368999 | -2703.367976        | -2703.559523        | -2704.8211061          |
| 6d-IM <sub>B1</sub>             | -2703.513169   | -2703.440004 | -2703.438981        | -2703.631649        | -2704.8986373          |
| 6-TS <sub>B1</sub>              | -2703.504701   | -2703.432878 | -2703.431855        | -2703.620508        | -2704.8873953          |
| 6a-TS <sub>B1</sub>             | -2703.487915   | -2703.415358 | -2703.414335        | -2703.605584        | -2704.8695573          |
| 7-IM <sub>B1</sub>              | -2703.510797   | -2703.437510 | -2703.436487        | -2703.629422        | -2704.8888626          |
| 7-TS <sub>B1</sub>              | -2703.495648   | -2703.422625 | -2703.421602        | -2703.614306        | -2704.8703516          |
| LCu-OBpin                       | -1377.790717   | -1377.756975 | -1377.755952        | -1377.861197        | -1379.0898920          |
| <i>E</i> -P1                    | -1325.754391   | -1325.716190 | -1325.715167        | -1325.827995        | -1325.8027605          |
| 3b-TS <sub>B1</sub>             | -2069.828191   | -2069.776592 | -2069.775569        | -2069.922890        | -2071.0947855          |
| 4b-IM <sub>B1</sub>             | -2069.830531   | -2069.779493 | -2069.778470        | -2069.922880        | -2071.1074240          |
| 8-TS <sub>B1</sub>              | -2069.815314   | -2069.763683 | -2069.762661        | -2069.908146        | -2071.0898190          |
| 8-IM <sub>B1</sub>              | -2069.847621   | -2069.794773 | -2069.793751        | -2069.945871        | -2071.1118037          |
| 9-TS <sub>B1</sub>              | -2075.519814   | -2075.462780 | -2075.461757        | -2075.622745        | -2076.8324817          |

|                          |              |              |              |              |               |
|--------------------------|--------------|--------------|--------------|--------------|---------------|
| 9-IM <sub>B1</sub>       | -2075.524302 | -2075.467327 | -2075.466304 | -2075.623528 | -2076.8628252 |
| 10-TS <sub>B1</sub>      | -2075.507225 | -2075.451056 | -2075.450033 | -2075.606109 | -2076.8471330 |
| 10-IM <sub>B1</sub>      | -1470.727256 | -1470.688444 | -1470.687421 | -1470.809746 | -1471.9727981 |
| 11-TS <sub>B1</sub>      | -1859.219003 | -1859.165286 | -1859.164263 | -1859.318611 | -1860.5561335 |
| LCu-Oi-Pr                | -1085.068520 | -1085.041214 | -1085.040191 | -1085.132678 | -1086.3569275 |
| P2                       | -579.925030  | -579.908076  | -579.907053  | -579.974205  | -579.9094569  |
| 12-TS <sub>B1</sub>      | -1907.246838 | -1907.195347 | -1907.194324 | -1907.338268 | -1908.6316958 |
| P3                       | -990.444135  | -990.415458  | -990.414435  | -990.508029  | -990.4603392  |
| 13-TS <sub>B1</sub>      | -2292.892312 | -2292.829954 | -2292.828931 | -2292.999478 | -2294.2457988 |
| 11-IM <sub>B1</sub>      | -2292.953458 | -2292.893476 | -2292.892453 | -2293.053293 | -2294.3129281 |
| 14-TS <sub>B1</sub>      | -2292.924617 | -2292.862869 | -2292.861846 | -2293.027724 | -2294.2734702 |
| LCu-OH                   | -967.214348  | -967.191724  | -967.190701  | -967.269878  | -968.4942868  |
| 3c-TS <sub>B1</sub>      | -2264.077025 | -2264.017114 | -2264.016091 | -2264.182487 | -2265.3971073 |
| 12-IM <sub>B1</sub>      | -2264.116139 | -2264.055388 | -2264.054365 | -2264.226536 | -2265.4228527 |
| 15-TS <sub>B1</sub>      | -1881.244219 | -1881.195310 | -1881.194287 | -1881.335118 | -1882.5197576 |
| 13-IM <sub>B1</sub>      | -1881.254318 | -1881.205158 | -1881.204135 | -1881.350009 | -1882.5291535 |
| 16-TS <sub>B1</sub>      | -1881.248027 | -1881.200284 | -1881.199261 | -1881.336054 | -1882.5298632 |
| 14-IM <sub>B1</sub>      | -1881.290479 | -1881.240894 | -1881.239871 | -1881.382970 | -1882.5658304 |
| 17-TS <sub>B1</sub>      | -2264.109846 | -2264.049847 | -2264.048824 | -2264.219271 | -2265.4127146 |
| 15-IM <sub>B1</sub>      | -2264.096657 | -2264.037467 | -2264.036444 | -2264.200106 | -2265.4235899 |
| 18-TS <sub>B1</sub>      | -2891.974614 | -2891.897630 | -2891.896607 | -2892.101107 | -2893.3321402 |
| 16-IM <sub>B1</sub>      | -2892.078156 | -2892.002708 | -2892.001685 | -2892.199555 | -2893.4447170 |
| 19-TS <sub>B1</sub>      | -2458.322495 | -2458.255337 | -2458.254314 | -2458.439025 | -2459.6746087 |
| 17-IM <sub>B1</sub>      | -1659.344544 | -1659.303363 | -1659.302340 | -1659.430889 | -1660.5671533 |
| 20-TS <sub>B1</sub>      | -2269.729884 | -2269.665998 | -2269.664975 | -2269.840736 | -2271.0933918 |
| 18-IM <sub>B1</sub>      | -1470.749322 | -1470.711323 | -1470.710300 | -1470.829142 | -1471.9829007 |
| 21-TS <sub>B1</sub>      | -2703.379488 | -2703.305797 | -2703.304774 | -2703.499133 | -2704.7477201 |
| 19-IM <sub>B1</sub>      | -2703.482764 | -2703.410473 | -2703.409450 | -2703.598152 | -2704.8591509 |
| 22-TS <sub>B1</sub>      | -1766.282971 | -1766.235268 | -1766.234245 | -1766.372603 | -1767.6667750 |
| 20-IM <sub>B1</sub>      | -1766.305337 | -1766.257037 | -1766.256014 | -1766.395152 | -1767.6984418 |
| 23-TS <sub>B1</sub>      | -1161.467254 | -1161.437530 | -1161.436507 | -1161.534096 | -1162.7771243 |
| 21-IM <sub>B1</sub>      | -1907.257275 | -1907.205627 | -1907.204604 | -1907.348865 | -1908.6333018 |
| 24-TS <sub>B1</sub>      | -1907.246838 | -1907.195347 | -1907.194324 | -1907.338268 | -1908.6316958 |
| 22-IM <sub>B1</sub>      | -1907.277374 | -1907.224599 | -1907.223576 | -1907.374842 | -1908.6479110 |
| 25-TS <sub>B1</sub>      | -1907.246838 | -1907.195347 | -1907.194324 | -1907.338268 | -1908.6316958 |
| 23-IM <sub>B1</sub>      | -1907.277374 | -2212.797345 | -1907.224599 | -1907.374842 | -1908.6479110 |
| 4-TS <sub>B1</sub> -D3   | -2703.624308 | -2703.552714 | -2703.551691 | -2703.740997 | -2704.8127938 |
| 9-TS <sub>B1</sub> -D3   | -2075.653771 | -2075.597880 | -2075.596857 | -2075.751347 | -2076.8421352 |
| 4-TS <sub>B1</sub> -BW91 | -2703.148801 | -2703.073309 | -2703.072286 | -2703.270154 | -2704.7971231 |
| 4-TS <sub>B1</sub> -M06  | -2701.750184 | -2701.677964 | -2701.676941 | -2701.864786 | -2704.8240284 |
| 9-TS <sub>B1</sub> -BW91 | -2075.324750 | -2075.266405 | -2075.265382 | -2075.429706 | -2076.8225735 |
| 9-TS <sub>B1</sub> -M06  | -2074.205950 | -2074.150942 | -2074.149919 | -2074.297110 | -2076.8574140 |
| LCu-Bneop                | -1263.165511 | -1263.134225 | -1263.133202 | -1263.234278 | -1264.456198  |

|                                  |              |              |              |              |               |
|----------------------------------|--------------|--------------|--------------|--------------|---------------|
| B <sub>2</sub> neop <sub>2</sub> | -743.588922  | -743.569254  | -743.568232  | -743.639275  | -743.6390471  |
| LCu-OBenop                       | -1338.492600 | -1338.460535 | -1338.459513 | -1338.562221 | -1339.782325  |
| <i>i</i> -PrOBenop               | -565.541524  | -565.526122  | -565.525099  | -565.585609  | -565.5671958  |
| 1-IM <sub>B2</sub>               | -2030.460772 | -2030.410993 | -2030.409970 | -2030.554481 | -2031.730735  |
| 1-TS <sub>B2</sub>               | -2030.455997 | -2030.406427 | -2030.405404 | -2030.548783 | -2031.729686  |
| 2-IM <sub>B2</sub>               | -2030.538371 | -2030.488726 | -2030.487703 | -2030.631444 | -2031.802617  |
| 2-TS <sub>B2</sub>               | -2030.517495 | -2030.467427 | -2030.466404 | -2030.610740 | -2031.779668  |
| 3-IM <sub>B2</sub>               | -2030.568055 | -2030.516891 | -2030.515868 | -2030.666590 | -2031.819122  |
| 3-TS <sub>B2</sub>               | -2030.549743 | -2030.498137 | -2030.497115 | -2030.646470 | -2031.812248  |
| 4-IM <sub>B2</sub>               | -1841.974425 | -1841.926440 | -1841.925417 | -1842.066080 | -1843.238596  |
| 1a-IM <sub>B2</sub>              | -2030.462794 | -2030.411874 | -2030.410851 | -2030.559670 | -2031.729263  |
| 1a-TS <sub>B2</sub>              | -2030.451165 | -2030.401513 | -2030.400490 | -2030.545192 | -2031.724018  |
| 2a-IM <sub>B2</sub>              | -2030.532689 | -2030.483979 | -2030.482956 | -2030.623235 | -2031.796939  |
| 3a-TS <sub>B2</sub>              | -2774.120634 | -2774.048595 | -2774.047572 | -2774.243973 | -2775.436579  |
| 4a-IM <sub>B2</sub>              | -1510.974765 | -1510.935282 | -1510.934259 | -1511.055204 | -1510.988116  |
| 4-TS <sub>B2</sub>               | -2585.551307 | -2585.482392 | -2585.481370 | -2585.669782 | -2586.879739  |
| 5-IM <sub>B2</sub>               | -2585.570971 | -2585.501585 | -2585.500562 | -2585.690319 | -2586.914521  |
| 5a-TS <sub>B2</sub>              | -2585.562383 | -2585.493817 | -2585.492794 | -2585.680581 | -2586.908749  |
| 6a-IM <sub>B2</sub>              | -2585.627667 | -2585.559349 | -2585.558326 | -2585.743509 | -2586.973122  |
| 5b-TS <sub>B2</sub>              | -2585.555189 | -2585.486606 | -2585.485583 | -2585.671794 | -2586.902085  |
| 6b-IM <sub>B2</sub>              | -2585.619374 | -2585.552435 | -2585.551412 | -2585.732790 | -2586.001051  |
| 6-TS <sub>B2</sub>               | -2585.616142 | -2585.548297 | -2585.547274 | -2585.731256 | -2586.9644345 |
| 7-IM <sub>B2</sub>               | -2585.606514 | -2585.538402 | -2585.537379 | -2585.722661 | -2586.968481  |
| 7-TS <sub>B2</sub>               | -2585.606514 | -2585.538402 | -2585.537379 | -2585.722661 | -2586.9466922 |
| 3b-TS <sub>B2</sub>              | -2030.533408 | -2030.484240 | -2030.483217 | -2030.627124 | -2031.792853  |
| 4b-IM <sub>B2</sub>              | -2030.539801 | -2030.489730 | -2030.488707 | -2030.631146 | -2031.806378  |
| 8-TS <sub>B2</sub>               | -2030.513915 | -2030.463695 | -2030.462672 | -2030.607255 | -2031.782578  |
| 8-IM <sub>B2</sub>               | -2030.556847 | -2030.505816 | -2030.504793 | -2030.652965 | -2031.809961  |
| 3c-TS <sub>B2</sub>              | -2224.787051 | -2224.728937 | -2224.727914 | -2224.890682 | -2226.096468  |
| 12-IM <sub>B2</sub>              | -2224.827963 | -2224.768760 | -2224.767737 | -2224.938181 | -2226.11775   |
| 9-TS <sub>B2</sub>               | -2036.224599 | -2036.169132 | -2036.168109 | -2036.326854 | -2037.529574  |
| 9-IM <sub>B2</sub>               | -2036.226665 | -2036.172005 | -2036.170982 | -2036.324062 | -2037.552312  |
| 10-TS <sub>B2</sub>              | -2036.208653 | -2036.153106 | -2036.152083 | -2036.309604 | -2037.53444   |
| 10-IM <sub>B2</sub>              | -1470.727256 | -1470.688444 | -1470.687421 | -1470.809746 | -1471.972798  |
| 10a-TS <sub>B2</sub>             | -2230.433672 | -2230.373511 | -2230.372488 | -2230.541624 | -2231.775509  |
| 10b-TS <sub>B2</sub>             | -1145.343287 | -1145.309313 | -1145.308290 | -1145.415041 | -1145.390814  |
| 10c-TS <sub>B2</sub>             | -1339.607074 | -1339.566182 | -1339.565159 | -1339.686054 | -1339.712398  |
| 11-TS <sub>B2</sub>              | -1859.219003 | -1859.165286 | -1859.164263 | -1859.318611 | -1860.556134  |
| 12-TS <sub>B2</sub>              | -1828.648872 | -1828.600768 | -1828.599745 | -1828.737780 | -1830.009613  |
| 13-TS <sub>B2</sub>              | -2214.294673 | -2214.235507 | -2214.234484 | -2214.400940 | -2215.626495  |
| 11-IM <sub>B2</sub>              | -2214.359521 | -2214.300668 | -2214.299645 | -2214.463153 | -2215.692308  |
| 14-TS <sub>B2</sub>              | -2214.330913 | -2214.272394 | -2214.271371 | -2214.432197 | -2215.657543  |
| 15-TS <sub>B2</sub>              | -1841.941923 | -1841.894998 | -1841.893975 | -1842.032185 | -1843.207632  |

|                                 |              |              |              |              |               |
|---------------------------------|--------------|--------------|--------------|--------------|---------------|
| 13-IM <sub>B2</sub>             | -1841.960213 | -1841.913128 | -1841.912105 | -1842.049837 | -1843.2273    |
| 16-TS <sub>B2</sub>             | -1841.954260 | -1841.907513 | -1841.906490 | -1842.043582 | -1843.227522  |
| 14-IM <sub>B2</sub>             | -1841.995739 | -1841.947801 | -1841.946778 | -1842.088028 | -1843.258808  |
| 17-TS <sub>B2</sub>             | -2224.818831 | -2224.762146 | -2224.761123 | -2224.923978 | -2226.104606  |
| 15-IM <sub>B2</sub>             | -2224.804148 | -2224.746315 | -2224.745292 | -2224.905070 | -2226.123085  |
| 18-TS <sub>B2</sub>             | -2774.083913 | -2774.012132 | -2774.011109 | -2774.205382 | -2775.407954  |
| 16-IM <sub>B2</sub>             | -2774.190999 | -2774.120521 | -2774.119498 | -2774.310261 | -2775.523336  |
| 19-TS <sub>B2</sub>             | -2419.029147 | -2418.963790 | -2418.962767 | -2419.145084 | -2420.37075   |
| 17-IM <sub>B2</sub>             | -1659.344544 | -1659.303363 | -1659.302340 | -1659.430889 | -1660.567153  |
| 20-TS <sub>B2</sub>             | -2230.433461 | -2230.371524 | -2230.370501 | -2230.542623 | -2231.791133  |
| 18-IM <sub>B2</sub>             | -1470.749322 | -1470.711323 | -1470.710300 | -1470.829142 | -1471.982901  |
| 21-TS <sub>B2</sub>             | -2585.487731 | -2585.419016 | -2585.417993 | -2585.604570 | -2586.824273  |
| 19-IM <sub>B2</sub>             | -2585.596720 | -2585.528768 | -2585.527745 | -2585.710227 | -2586.946075  |
| 22-TS <sub>B2</sub>             | -1726.987763 | -1726.941704 | -1726.940681 | -1727.076386 | -1728.36031   |
| 20-IM <sub>B2</sub>             | -1727.006882 | -1726.960989 | -1726.959966 | -1727.094476 | -1728.388481  |
| 23-TS <sub>B2</sub>             | -1161.467254 | -1161.437530 | -1161.436507 | -1161.534096 | -1162.777124  |
| 21-IM <sub>B2</sub>             | -1828.666426 | -1828.617882 | -1828.616859 | -1828.756948 | -1830.021932  |
| 24-TS <sub>B2</sub>             | -1828.648872 | 1828.600768  | -1828.599745 | -1828.737780 | -1830.009613  |
| 22-IM <sub>B2</sub>             | -1828.680916 | -1828.635206 | -1828.634183 | -1828.767238 | -1830.031037  |
| 25-TS <sub>B2</sub>             | -1828.648872 | 1828.600768  | -1828.599745 | -1828.737780 | -1830.009613  |
| 23-IM <sub>B2</sub>             | -1828.680916 | -1828.635206 | -1828.634183 | -1828.767238 | -1830.031037  |
| <i>E</i> -P1'                   | -1247.164387 | -1247.129331 | -1247.128308 | -1247.237013 | -1247.193221  |
| P3'                             | -951.148512  | -951.121518  | -951.120495  | -951.210777  | -951.1554424  |
| B <sub>2</sub> cat <sub>2</sub> | -812.694320  | -812.679496  | -812.678473  | -812.739902  | -812.5782136  |
| 4-IM <sub>B3</sub>              | -1876.526955 | -1876.481024 | -1876.480001 | -1876.619456 | -1877.7101709 |
| 4-TS <sub>B3</sub>              | -2689.232003 | -2689.169938 | -2689.168915 | -2689.345884 | -2690.3076090 |
| 9-TS <sub>B3</sub>              | -2070.776840 | -2070.723851 | -2070.722828 | -2070.877376 | -2071.9993373 |
| 4-TS <sub>B2</sub> -D3          | -2585.715080 | -2585.648634 | -2585.647611 | -2585.825056 | -2586.8876495 |
| 9-TS <sub>B2</sub> -D3          | -2036.355070 | -2036.300790 | -2036.299768 | -2036.451216 | -2037.5369103 |
| 4-TS <sub>B2</sub> -BW91        | -2585.278982 | -2585.209314 | -2585.208291 | -2585.397005 | -2586.8703189 |
| 4-TS <sub>B2</sub> -M06         | -2583.936368 | -2583.869936 | -2583.868913 | -2584.042998 | -2586.8976101 |
| 9-TS <sub>B2</sub> -BW91        | -2036.036715 | -2035.980099 | -2035.979076 | -2036.139842 | -2037.5189986 |
| 9-TS <sub>B2</sub> -M06         | -2034.944645 | -2034.890580 | -2034.889558 | -2035.038029 | -2037.5497666 |

$E_0$  = Sum of electronic and zero-point energies calculated by B3LYP in solvent

$E$  = Sum of electronic and thermal energies calculated by B3LYP in solvent

$H_{323.15}$  = Sum of electronic and thermal enthalpies calculated by B3LYP in solvent

$G_{323.15}$  = Sum of electronic and thermal free energies calculated by B3LYP in solvent

$E_{(M06)}$  = Single point energies calculated by M06 in solvent

**Section 8. Calculated imaginary frequencies of all transition states species.**

| Species                  | Frequency |
|--------------------------|-----------|
| 1-TS <sub>B1</sub>       | -133.21   |
| 2-TS <sub>B1</sub>       | -195.51   |
| 3-TS <sub>B1</sub>       | -95.15    |
| 1a-TS <sub>B1</sub>      | -186.91   |
| 3a-TS <sub>B1</sub>      | -104.97   |
| 4-TS <sub>B1</sub>       | -57.72    |
| 5a-TS <sub>B1</sub>      | -105.20   |
| 5b-TS <sub>B1</sub>      | -97.84    |
| 5c-TS <sub>B1</sub>      | -138.78   |
| 5d-TS <sub>B1</sub>      | -143.78   |
| 6-TS <sub>B1</sub>       | -40.56    |
| 6a-TS <sub>B1</sub>      | -251.51   |
| 7-TS <sub>B1</sub>       | -86.37    |
| 3b-TS <sub>B1</sub>      | -118.93   |
| 8-TS <sub>B1</sub>       | -227.78   |
| 9-TS <sub>B1</sub>       | -442.69   |
| 10-TS <sub>B1</sub>      | -211.55   |
| 11-TS <sub>B1</sub>      | -1180.18  |
| 12-TS <sub>B1</sub>      | -89.66    |
| 13-TS <sub>B1</sub>      | -115.71   |
| 14-TS <sub>B1</sub>      | -330.96   |
| 3c-TS <sub>B1</sub>      | -131.58   |
| 15-TS <sub>B1</sub>      | -180.08   |
| 16-TS <sub>B1</sub>      | -47.01    |
| 17-TS <sub>B1</sub>      | -67.45    |
| 18-TS <sub>B1</sub>      | -420.08   |
| 19-TS <sub>B1</sub>      | -1107.65  |
| 20-TS <sub>B1</sub>      | -1118.25  |
| 21-TS <sub>B1</sub>      | -408.79   |
| 22-TS <sub>B1</sub>      | -852.26   |
| 23-TS <sub>B1</sub>      | -667.20   |
| 24-TS <sub>B1</sub>      | -89.66    |
| 25-TS <sub>B1</sub>      | -89.66    |
| 4-TS <sub>B1</sub> -D3   | -35.36    |
| 9-TS <sub>B1</sub> -D3   | -396.79   |
| 4-TS <sub>B1</sub> -BW91 | -78.44    |
| 9-TS <sub>B1</sub> -BW91 | -251.75   |
| 4-TS <sub>B1</sub> -M06  | -16.77    |



|                          |          |
|--------------------------|----------|
| 9-TS <sub>B1</sub> -M06  | -131.33  |
| 1-TS <sub>B2</sub>       | -125.19  |
| 2-TS <sub>B2</sub>       | -206.75  |
| 3-TS <sub>B2</sub>       | -97.44   |
| 1a-TS <sub>B2</sub>      | -135.97  |
| 3a-TS <sub>B2</sub>      | -107.74  |
| 4-TS <sub>B2</sub>       | -109.92  |
| 5a-TS <sub>B2</sub>      | -124.20  |
| 5b-TS <sub>B2</sub>      | -106.02  |
| 6-TS <sub>B2</sub>       | -26.78   |
| 7-TS <sub>B2</sub>       | -76.08   |
| 3b-TS <sub>B2</sub>      | -106.41  |
| 8-TS <sub>B2</sub>       | -277.63  |
| 9-TS <sub>B2</sub>       | -477.36  |
| 10-TS <sub>B2</sub>      | -222.52  |
| 10a-TS <sub>B2</sub>     | -1282.27 |
| 10b-TS <sub>B2</sub>     | -1328.00 |
| 10c-TS <sub>B2</sub>     | -1153.11 |
| 11-TS <sub>B2</sub>      | -1180.18 |
| 12-TS <sub>B2</sub>      | -113.56  |
| 13-TS <sub>B2</sub>      | -130.02  |
| 14-TS <sub>B2</sub>      | -331.45  |
| 15-TS <sub>B2</sub>      | -212.96  |
| 16-TS <sub>B2</sub>      | -57.98   |
| 17-TS <sub>B2</sub>      | -327.51  |
| 18-TS <sub>B2</sub>      | -413.31  |
| 19-TS <sub>B2</sub>      | -1055.71 |
| 20-TS <sub>B2</sub>      | -1125.16 |
| 21-TS <sub>B2</sub>      | -414.76  |
| 22-TS <sub>B2</sub>      | -593.39  |
| 23-TS <sub>B2</sub>      | -667.20  |
| 24-TS <sub>B2</sub>      | -113.56  |
| 25-TS <sub>B2</sub>      | -113.56  |
| 4-TS <sub>B3</sub>       | -104.48  |
| 9-TS <sub>B3</sub>       | -288.00  |
| 4-TS <sub>B2</sub> -D3   | -45.62   |
| 9-TS <sub>B2</sub> -D3   | -788.40  |
| 4-TS <sub>B2</sub> -BW91 | -78.57   |
| 9-TS <sub>B2</sub> -BW91 | -309.32  |
| 4-TS <sub>B2</sub> -M06  | -90.61   |
| 9-TS <sub>B2</sub> -M06  | -606.75  |
